# Supplementary material for: Effects of a healthy lifestyle intervention and COVID-19-adjusted training curriculum on firefighter recruits
Source: Springer Nature journal article supplement (doi:10.1038/s41598-022-10979-2), 2022-06-23

**Supplemental Table 1.** Baseline demographics, body composition, physical fitness, and mental health of the recruits of the three classes at academy B

|                                     | Historical Control | Pandemic interrupted Class | Intervention Class | P value comparing recruits of the three classes |
|-------------------------------------|--------------------|----------------------------|--------------------|-------------------------------------------------|
| <b>N</b>                            | 36                 | 38                         | 37                 |                                                 |
| <b>Age</b>                          | 28.8 ± 6.5         | 30.7 ± 7.0                 | 29.1 ± 4.9         | 0.385                                           |
| <b>Male N (%)</b>                   | 34 (94.4%)         | 34 (89.5%)                 | 37 (100.0%)        | 0.141 <sup>a</sup>                              |
| <b>BMI (kg/m<sup>2</sup>)</b>       | 26.5 ± 3.2         | 29.1 ± 4.6                 | 28.5 ± 4.2         | 0.022                                           |
| <b>%BF</b>                          | 17.5 ± 5.6         | 28.7 ± 7.4                 | 23.9 ± 7.2         | <0.001                                          |
| <b>Push-Ups</b>                     | 36.6 ± 13.8        | 28.5 ± 9.2                 | 28.7 ± 10.9        | 0.003                                           |
| <b>Pull-Ups</b>                     | 5.7 ± 4.8          | 5.1 ± 5.3                  | 6.7 ± 5.2          | 0.436                                           |
| <b>Run Time 1.5 miles (minutes)</b> | 11.7 ± 1.3         | 12.1 ± 2.1                 | 12.3 ± 2.2         | 0.498                                           |
| <b>PREDIMED score</b>               | 6.4 ± 2.3          | 7.4 ± 2.2                  | 7.1 ± 2.2          | 0.182                                           |
| <b>MEDI-lifestyle score</b>         | 4.1 ± 1.2          | 3.7 ± 1.2                  | 4.0 ± 1.1          | 0.287                                           |
| <b>Beck Questionnaire</b>           | 0 (0-0.25)         | 0 (0-1)                    | 0 (0-1)            | 0.619 <sup>b</sup>                              |
| <b>PCL Questionnaire</b>            | 2 (0-4)            | 3 (0-7)                    | 1.5 (0-6)          | 0.648 <sup>b</sup>                              |
| <b>PHQ Score</b>                    | 0 (0-1.25)         | 0 (0-3)                    | 0 (0-2.25)         | 0.741 <sup>b</sup>                              |

Median (Q1-Q3) for Beck questionnaire, PCL questionnaire, and PHQ score. Mean ± SD for other variables except for Male. BMI: Body Mass Index. %BF: Percent Body Fat. Beck: Beck Depression Inventory for Primary Care. PCL: Post-Traumatic Stress Disorder (PTSD) Questionnaire. PHQ: Patient Health Questionnaire.

<sup>a</sup> Derived from Fisher's exact test.

<sup>b</sup> Derived from Kruskal-Wallis rank sum test.

**Supplemental Table 2.** Changes in recruits' selected body composition and physical fitness measurements from baseline to graduation of the three classes at academy B

|                                       | Historical Control | Pandemic interrupted Class | Intervention Class | <i>P</i> value comparing recruits of<br>the three classes |
|---------------------------------------|--------------------|----------------------------|--------------------|-----------------------------------------------------------|
| <b>N</b>                              | 36                 | 38                         | 37                 |                                                           |
| <b>BMI (kg/m<sup>2</sup>)</b>         | 0.01 ± 0.04        | -0.01 ± 0.05               | 0 ± 0.03           | 0.065                                                     |
| <b>%BF</b>                            | -0.05 ± 0.27       | -0.11 ± 0.13               | 0.01 ± 0.15        | 0.020                                                     |
| <b>Systolic blood pressure (mmHg)</b> | -6.0 ± 10.3        | NA                         | -7.2 ± 10.0        | 0.595                                                     |
| <b>Push-Ups</b>                       | 9.7 ± 6.5          | 7.1 ± 4.6                  | 8.2 ± 4.9          | 0.118                                                     |
| <b>Run Time 1.5 miles (minutes)</b>   | -0.9 ± 0.6         | 0.2 ± 1.5                  | -1.0 ± 0.9         | <0.001                                                    |
| <b>MEDI-lifestyle score</b>           | 1 (-1 – 2)         | NA                         | 0 (0 – 2)          | 0.848 <sup>a</sup>                                        |
| <b>Beck Questionnaire</b>             | 0 (0 – 0)          | NA                         | 0 (-1 – 0)         | 0.058 <sup>a</sup>                                        |

Median (Q1-Q3) for MEDI-lifestyle score and Beck questionnaire. Mean ± SD for other variables. BMI: Body Mass Index. %BF: Percent Body Fat. Beck: Beck Depression Inventory for Primary Care. NA: Not Available.

Absolute number changes for push-ups and run time. Percent changes for BMI and %BF.

<sup>a</sup> Derived from Wilcoxon rank sum test with continuity correction.

**Supplemental Table 3.** Multivariable adjusted selected health profiles comparing the academy training effects on the pandemic interrupted class to the historical control class at academy B

| <b>Outcome</b>                      | <b>Predictor</b>         | <b>Beta Coefficient</b> | <b>Standard Error</b> | <b>P value</b> |
|-------------------------------------|--------------------------|-------------------------|-----------------------|----------------|
| <b>BMI (kg/m<sup>2</sup>)</b>       | Time                     | 0.137                   | 0.111                 | 0.220          |
|                                     | Interrupted Class        | -2.055                  | 0.824                 | 0.015          |
|                                     | Interrupted Class × Time | -0.327                  | 0.155                 | 0.036          |
| <b>%BF</b>                          | Time                     | -0.846                  | 0.371                 | 0.024          |
|                                     | Interrupted Class        | 7.954                   | 1.182                 | <0.001         |
|                                     | Interrupted Class × Time | -0.727                  | 0.517                 | 0.162          |
| <b>Push-Ups</b>                     | Time                     | 4.847                   | 0.465                 | <0.001         |
|                                     | Interrupted Class        | 2.119                   | 3.659                 | 0.564          |
|                                     | Interrupted Class × Time | -1.295                  | 0.649                 | 0.048          |
| <b>Run Time 1.5 miles (minutes)</b> | Time                     | -0.476                  | 0.098                 | <0.001         |
|                                     | Interrupted Class        | -0.949                  | 0.490                 | 0.057          |
|                                     | Interrupted Class × Time | 0.574                   | 0.135                 | <0.001         |

BMI: Body Mass Index. %BF: Percent Body Fat.

Statistics derived from age, sex, baseline BMI, baseline percent body fat, and/or baseline pushup capacity adjusted mixed effects models.

**Supplemental Table 4.** Multivariable adjusted selected health profiles comparing the academy training effects on the Intervention class to the historical control class at academy B

| <b>Outcome</b>                 | <b>Predictor</b>          | <b>Beta Coefficient</b> | <b>Standard Error</b> | <b>P value</b> |
|--------------------------------|---------------------------|-------------------------|-----------------------|----------------|
| <b>%BF</b>                     | Time                      | -0.85                   | 0.36                  | 0.019          |
|                                | Intervention Class        | 4.37                    | 1.71                  | 0.013          |
|                                | Intervention Class × Time | 0.77                    | 0.50                  | 0.125          |
| <b>Systolic blood pressure</b> | Time                      | -2.99                   | 0.85                  | <0.001         |
|                                | Intervention Class        | -4.17                   | 2.81                  | 0.142          |
|                                | Intervention Class × Time | -0.64                   | 1.19                  | 0.595          |
| <b>Push-Ups</b>                | Time                      | 4.85                    | 0.48                  | <0.001         |
|                                | Intervention Class        | -2.19                   | 3.20                  | 0.495          |
|                                | Intervention Class × Time | -0.75                   | 0.67                  | 0.261          |
| <b>MEDI-lifestyle score</b>    | Time                      | 0.28                    | 0.11                  | 0.017          |
|                                | Intervention Class        | 0.26                    | 0.38                  | 0.503          |
|                                | Intervention Class × Time | -0.01                   | 0.16                  | 0.963          |
| <b>Beck questionnaire</b>      | Time                      | -0.01                   | 0.09                  | 0.880          |
|                                | Intervention Class        | 0.50                    | 0.40                  | 0.220          |
|                                | Intervention Class × Time | -0.24                   | 0.13                  | 0.064          |

BMI: Body Mass Index. %BF: Percent Body Fat. Beck: Beck Depression Inventory for Primary Care.

Statistics derived from age, sex, baseline percent body fat, baseline pushup capacity, and/or baseline Beck Depression Inventory for Primary Care score adjusted mixed effects models.

**Supplemental Figure.** Box plots showing the distributions of recruits' selected health profiles at baseline, mid-training, and academy graduation comparing a) the historical control class (n=36), b) the pandemic interrupted class (n=38), and c) the Intervention class (n=37). A. Body Mass Index (BMI); B. Percent Body Fat; C. Push-ups; D. 1.5-mile running time. The plots were derived from the recruits whose data were available at each time point. Post-hoc paired analysis with Holm adjustments were demonstrated by \*: P<0.05, \*\*: P<0.01, \*\*\*: P<0.001, \*\*\*\*: P<0.0001.

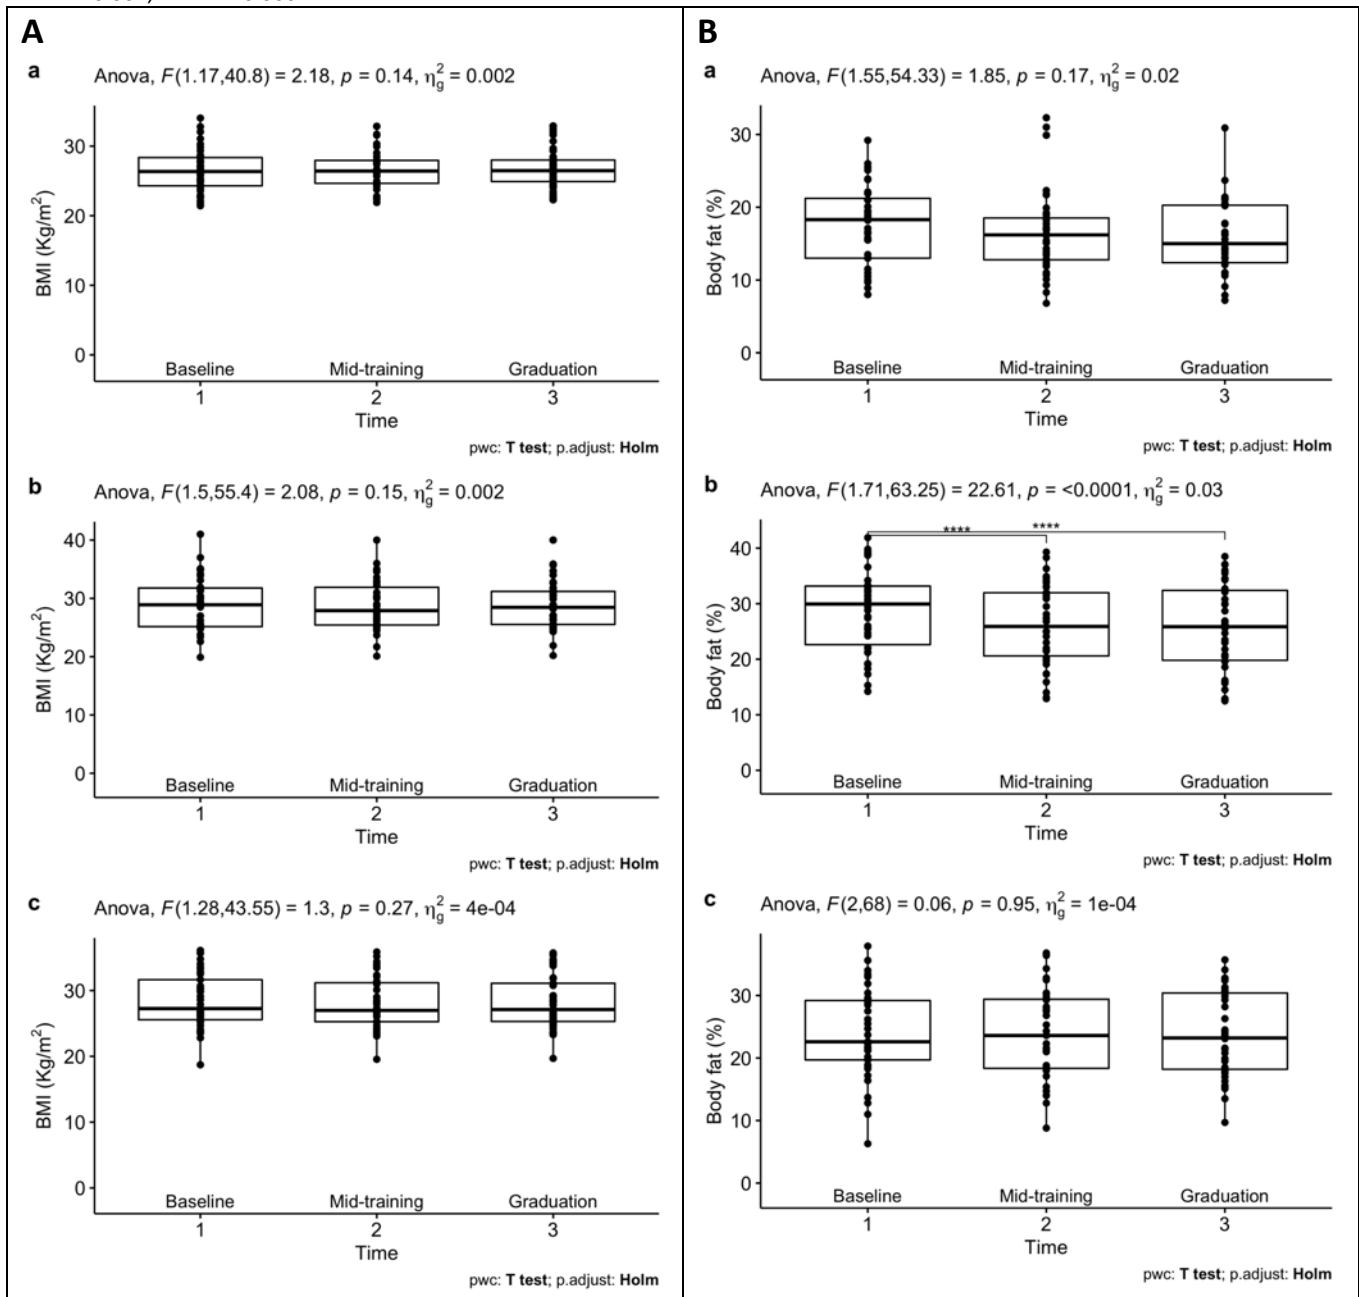

**C**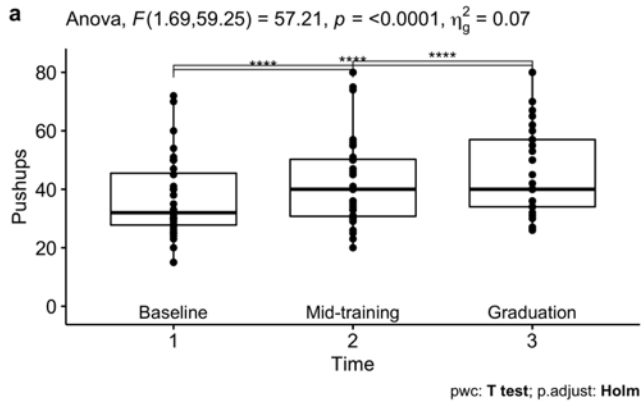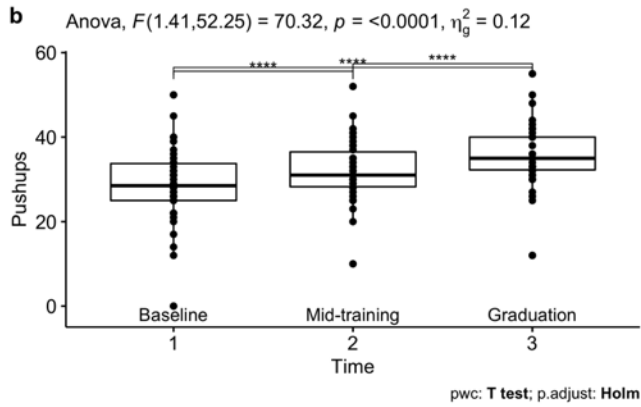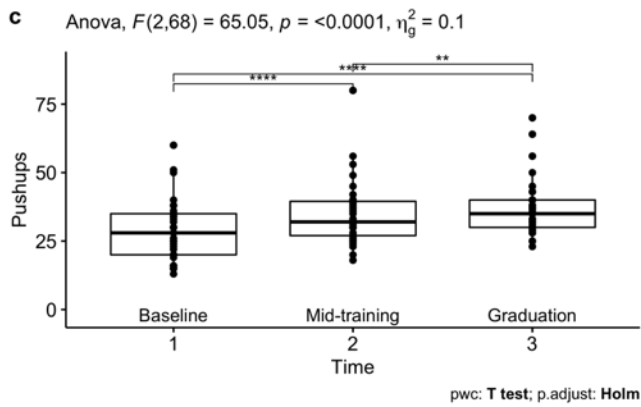**D**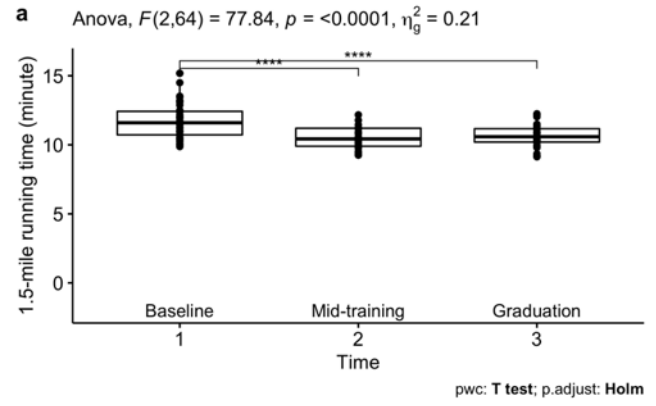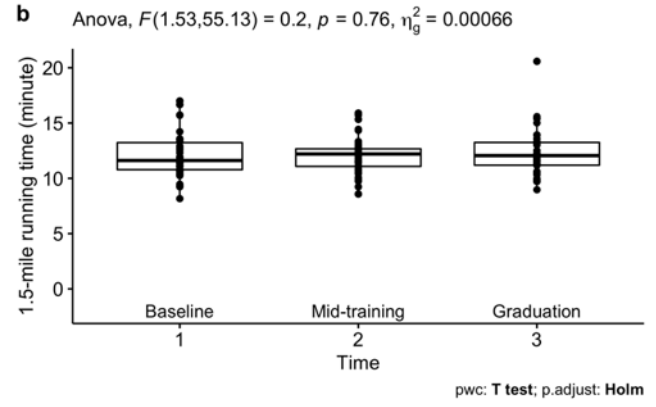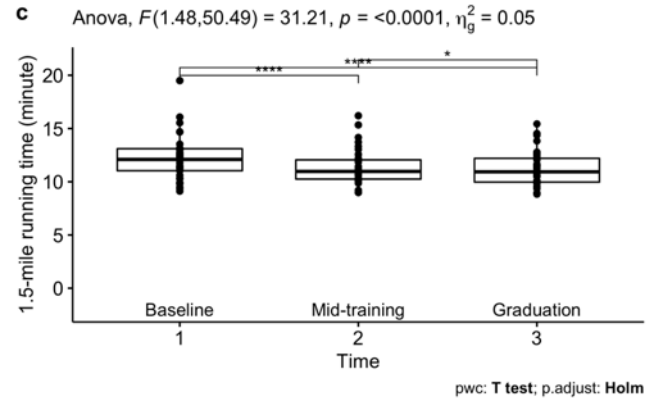

Supplement: MOESM1 [file 41598_2022_10979_MOESM1_ESM.pdf]
